# Supplementary material for: Deregulated RNAs involved in sympathetic regulation of sepsis-induced acute lung injury based on whole transcriptome sequencing
Source: PubMed Central journal article supplement (PMC9758828; doi:10.1186/s12864-022-09073-8), 2022-12-16
Supplement: 12864_2022_9073_MOESM2_ESM.pdf [file 12864_2022_9073_MOESM2_ESM.pdf]

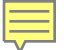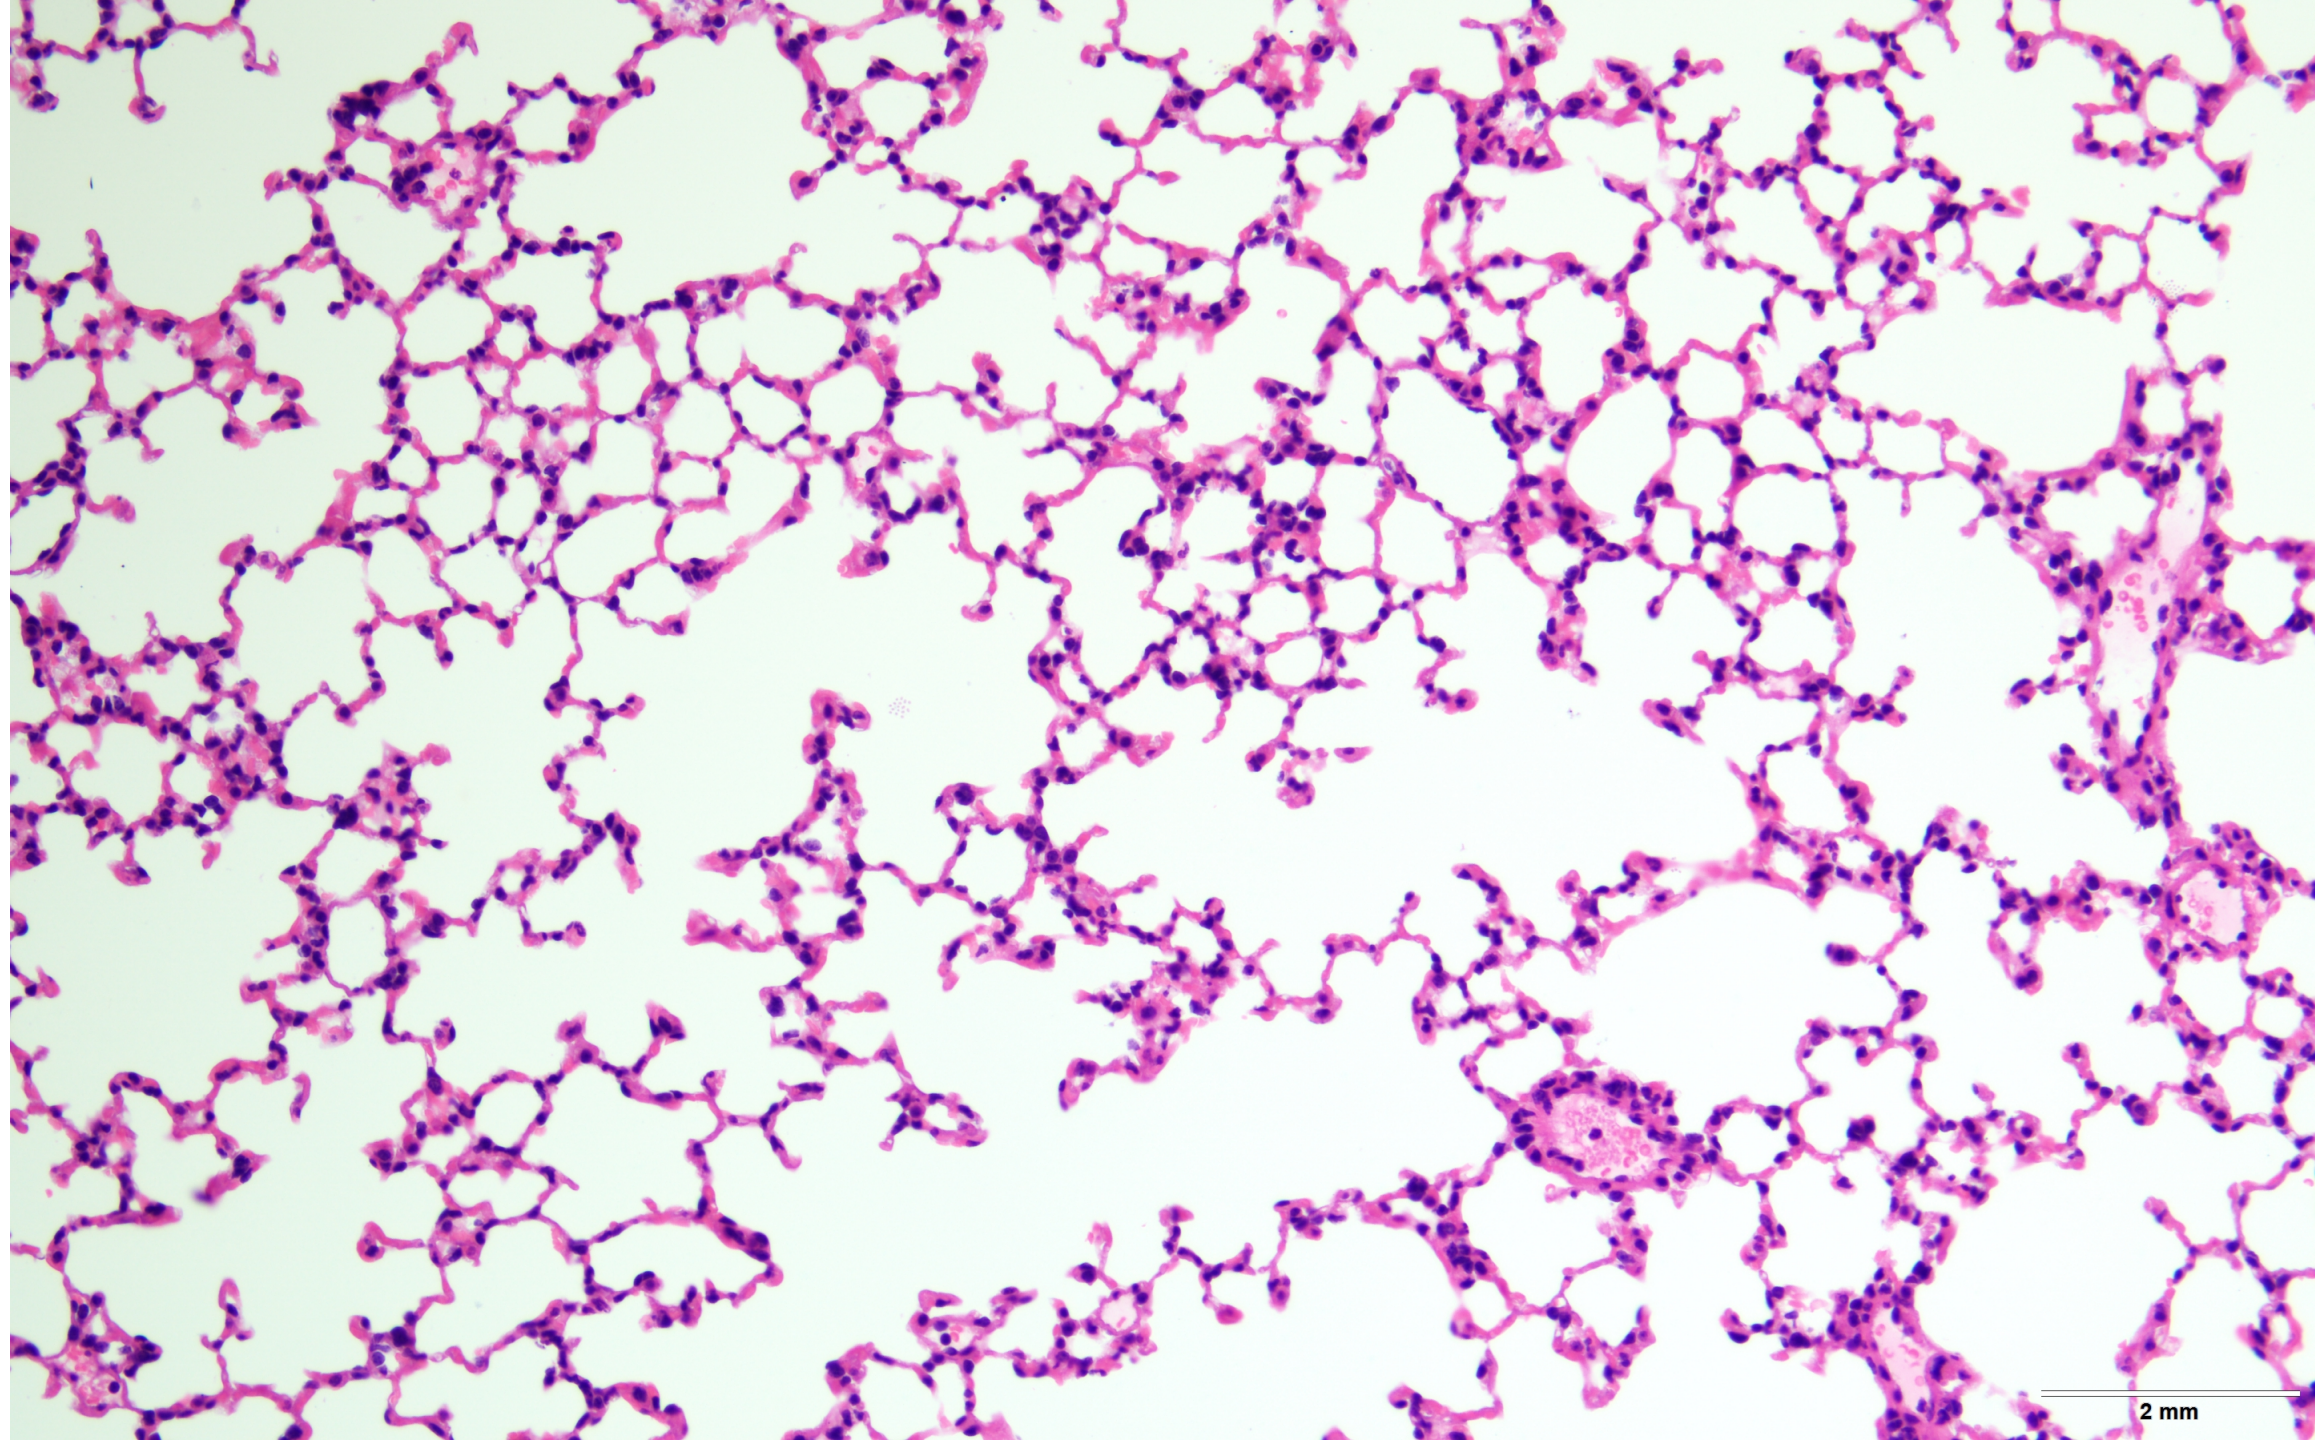

2 mm

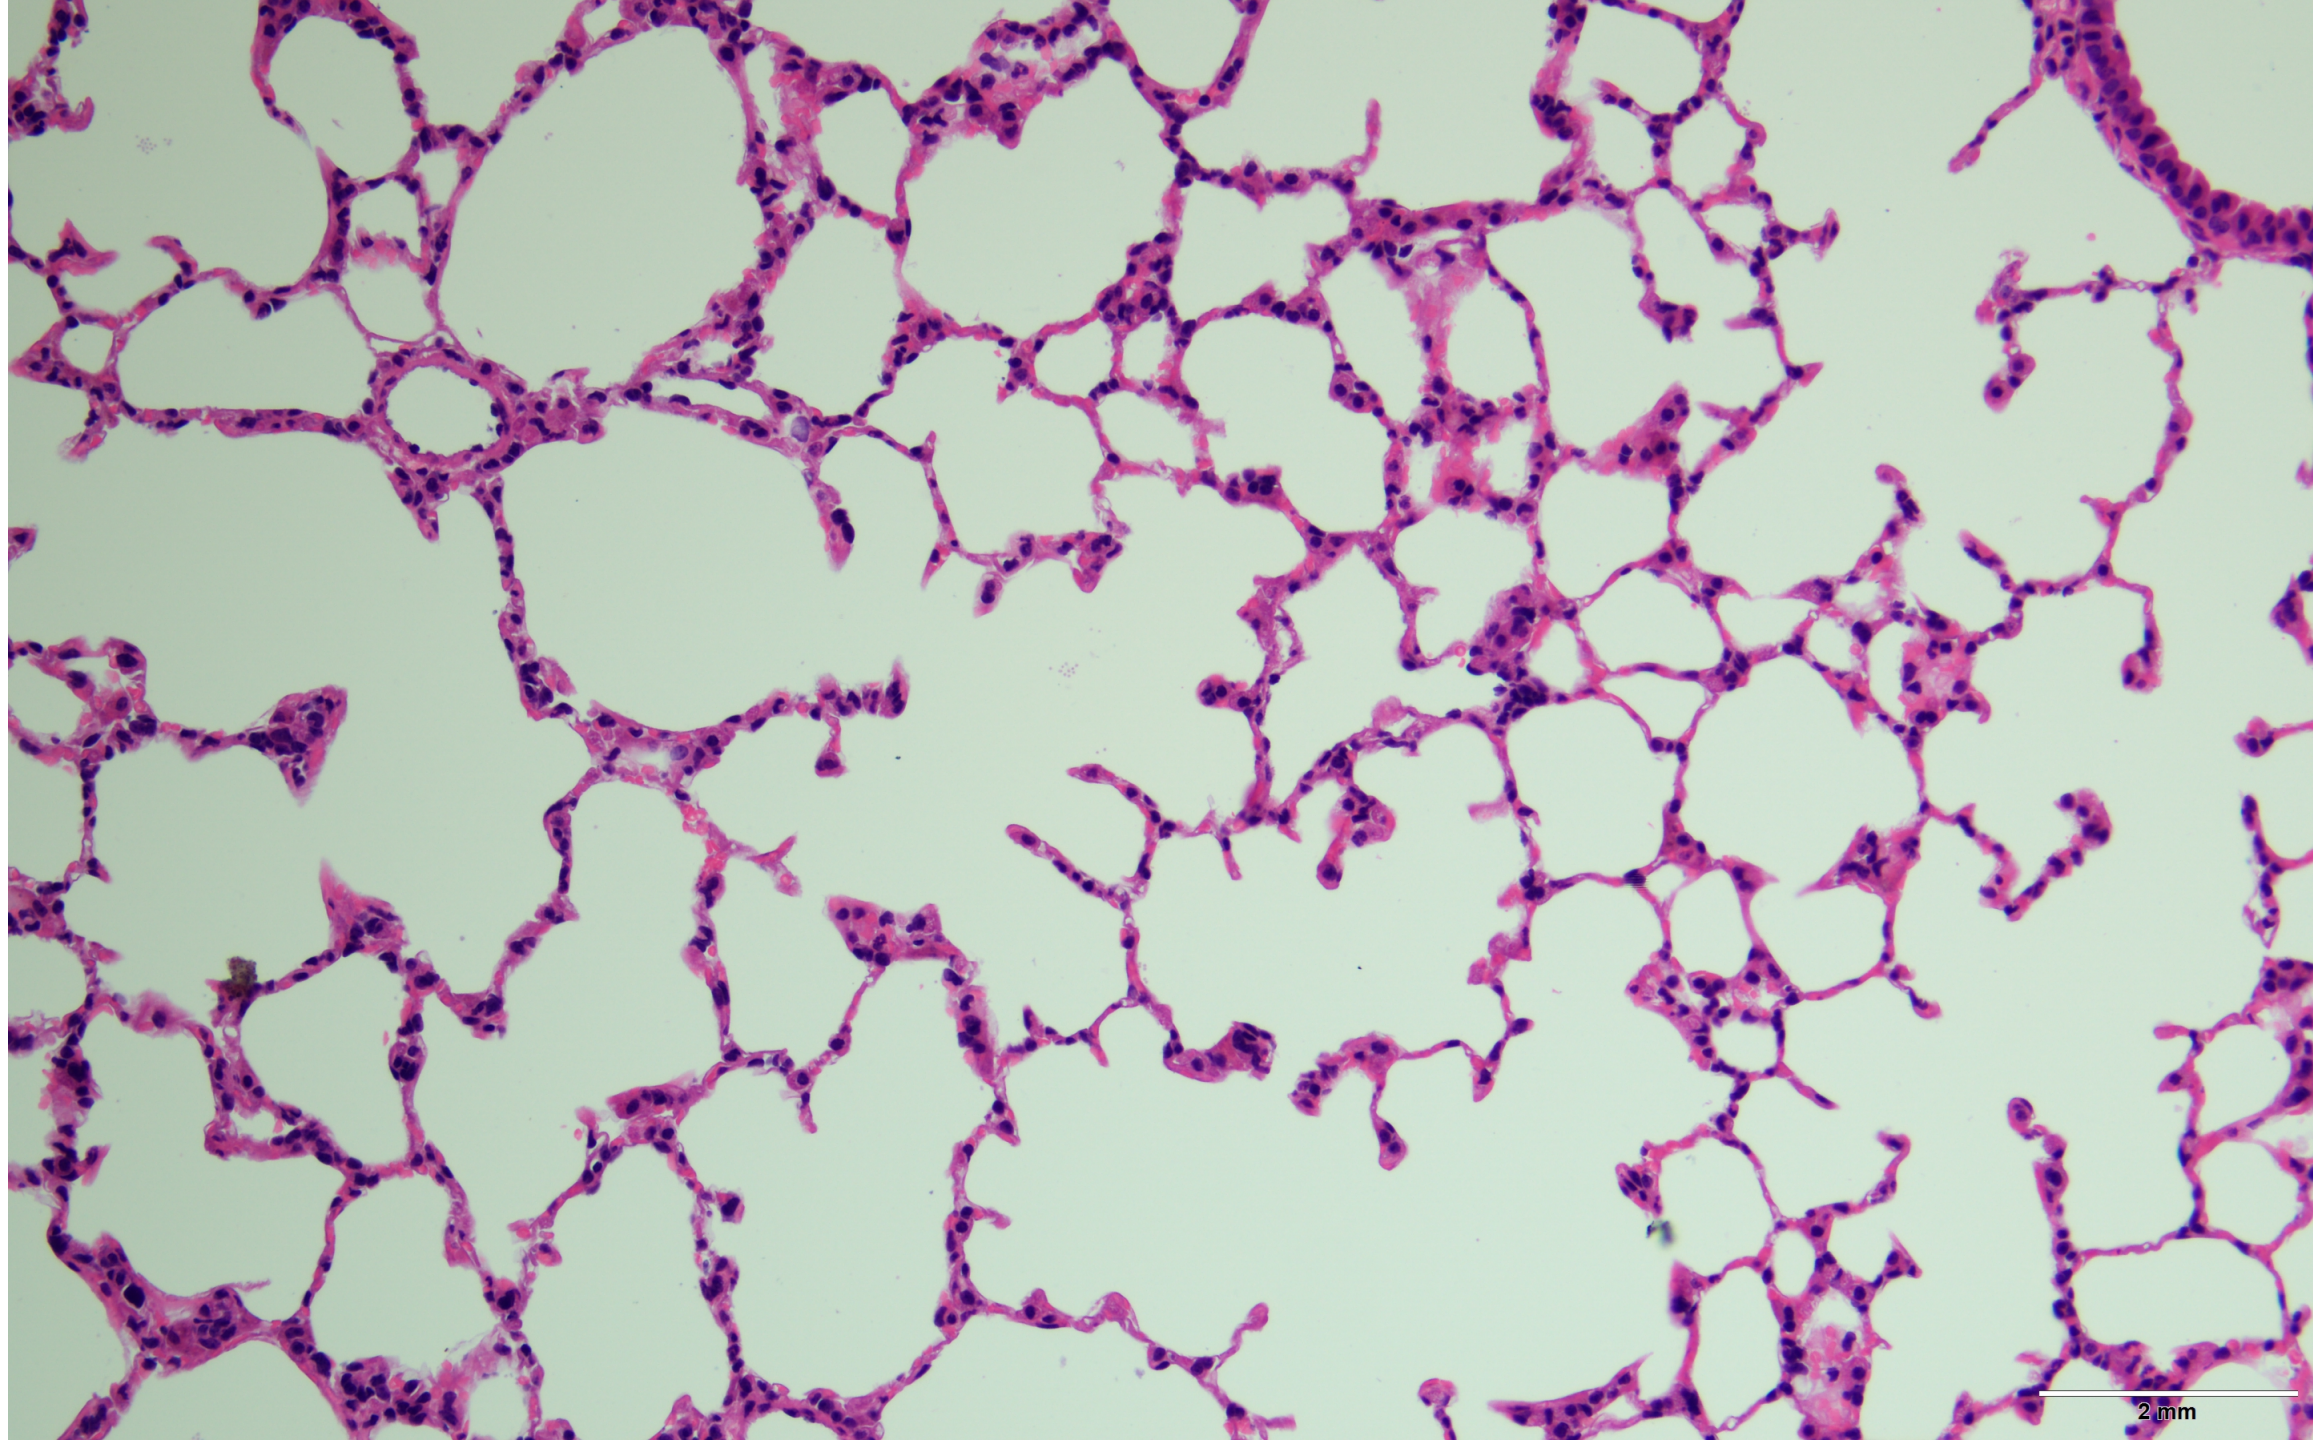

2 mm

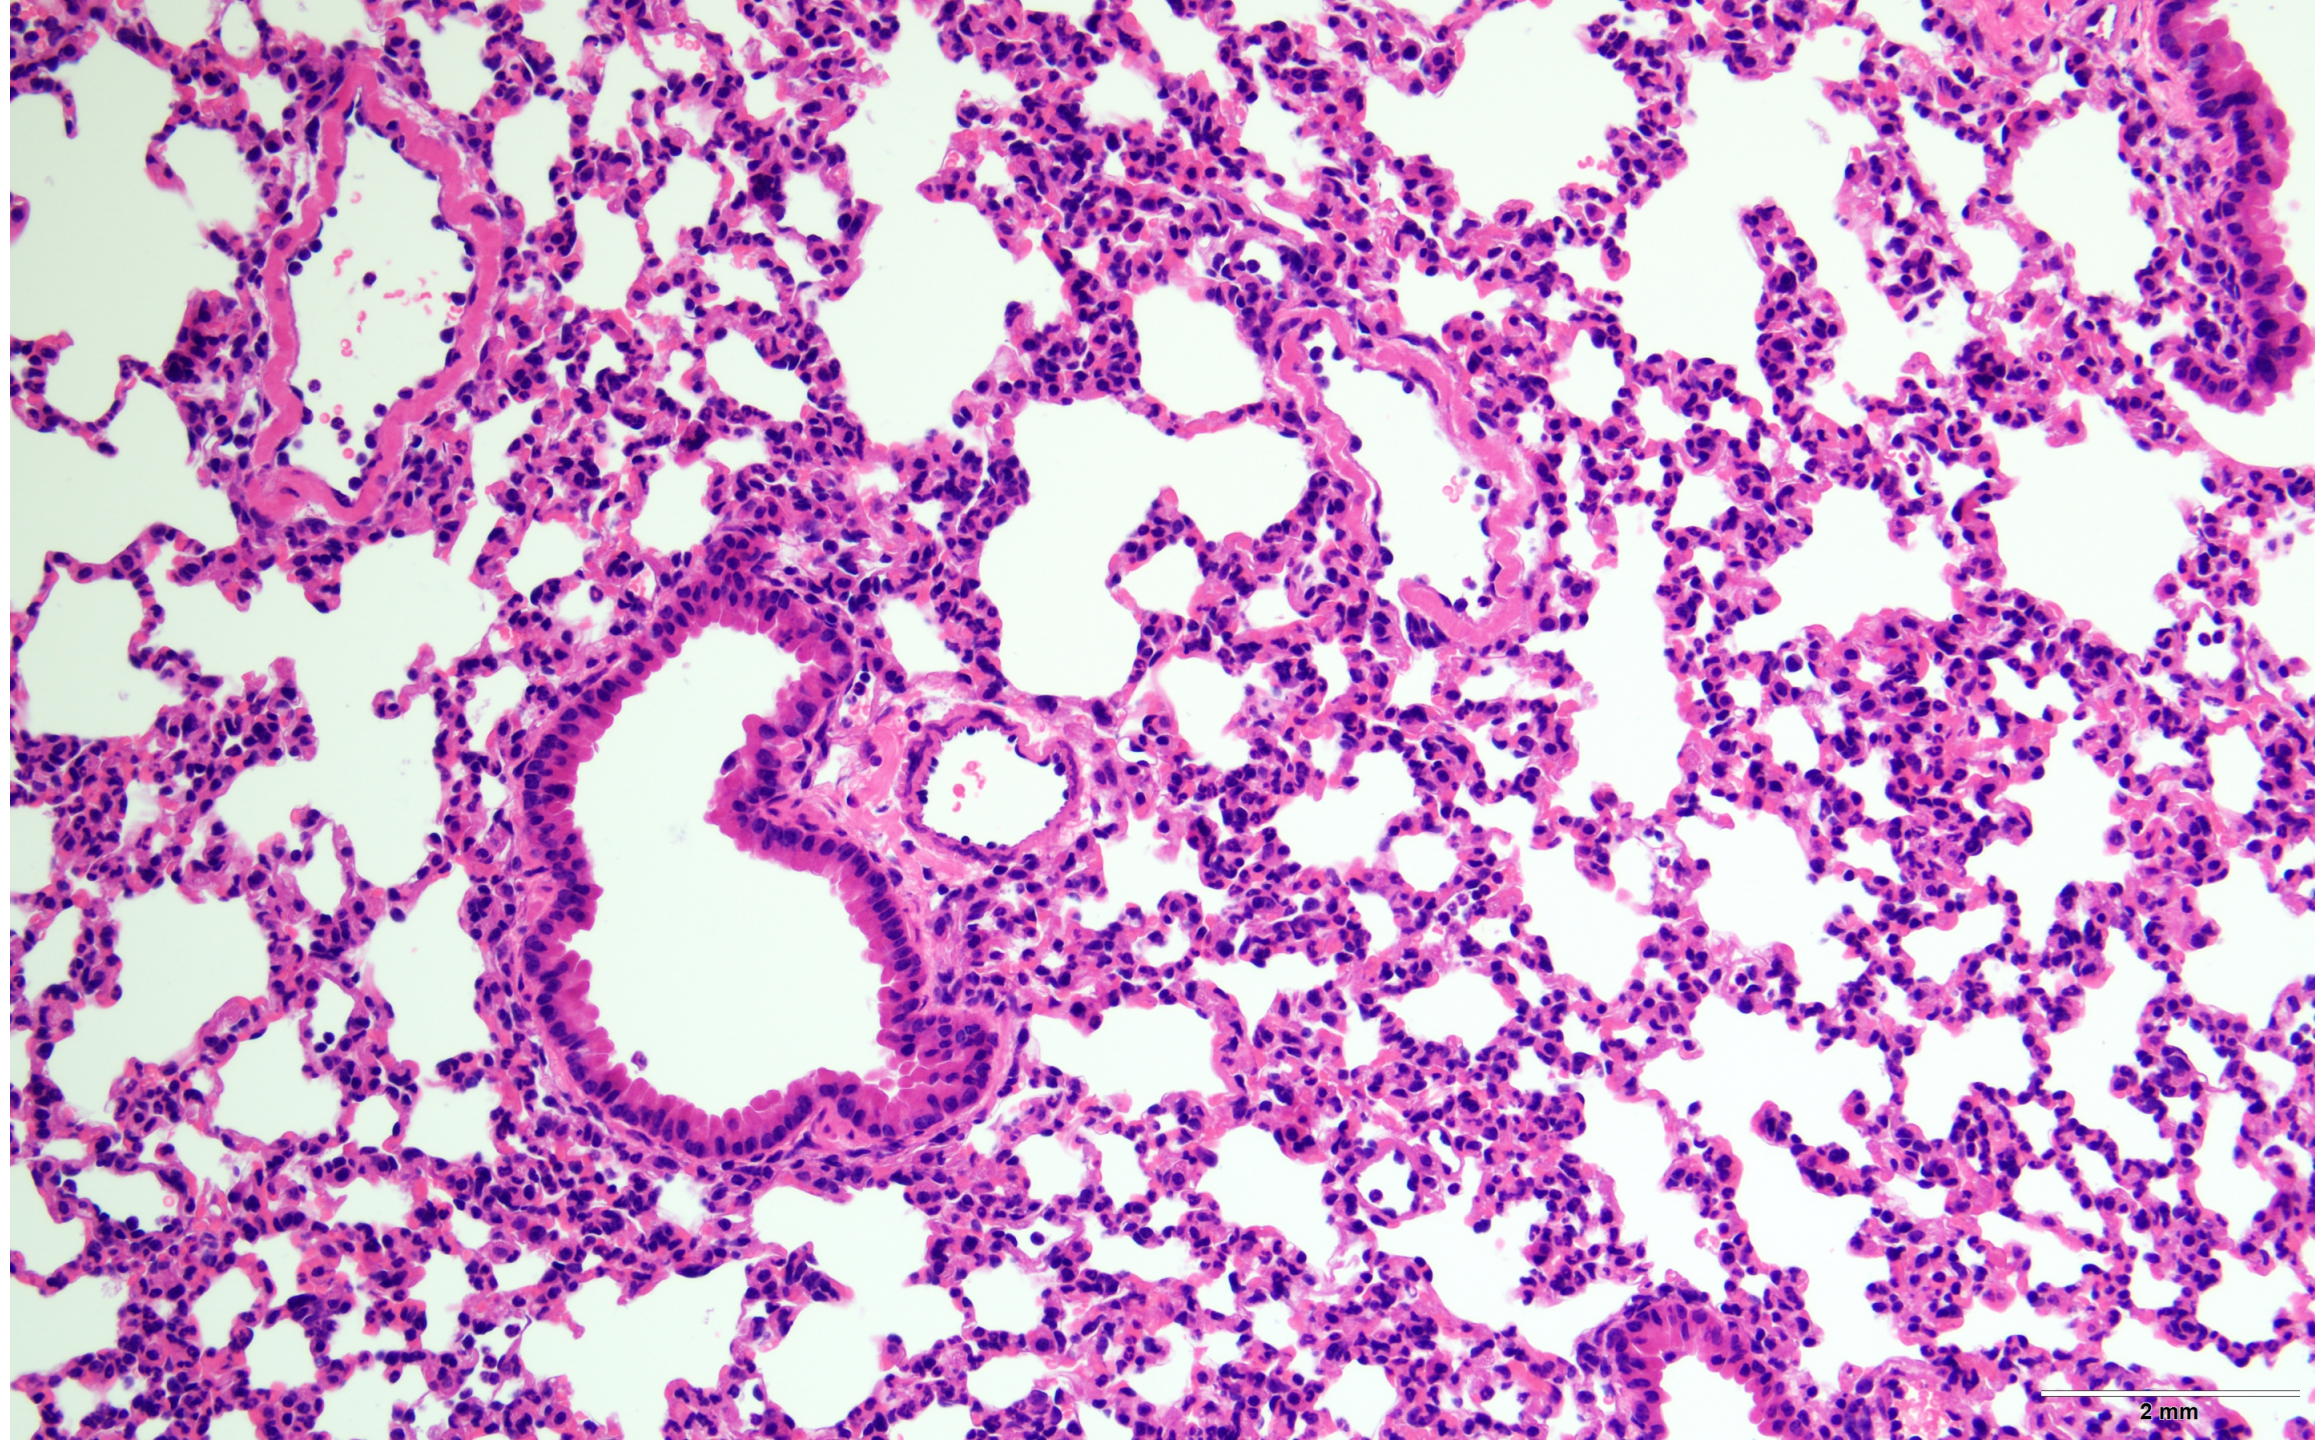

2 mm

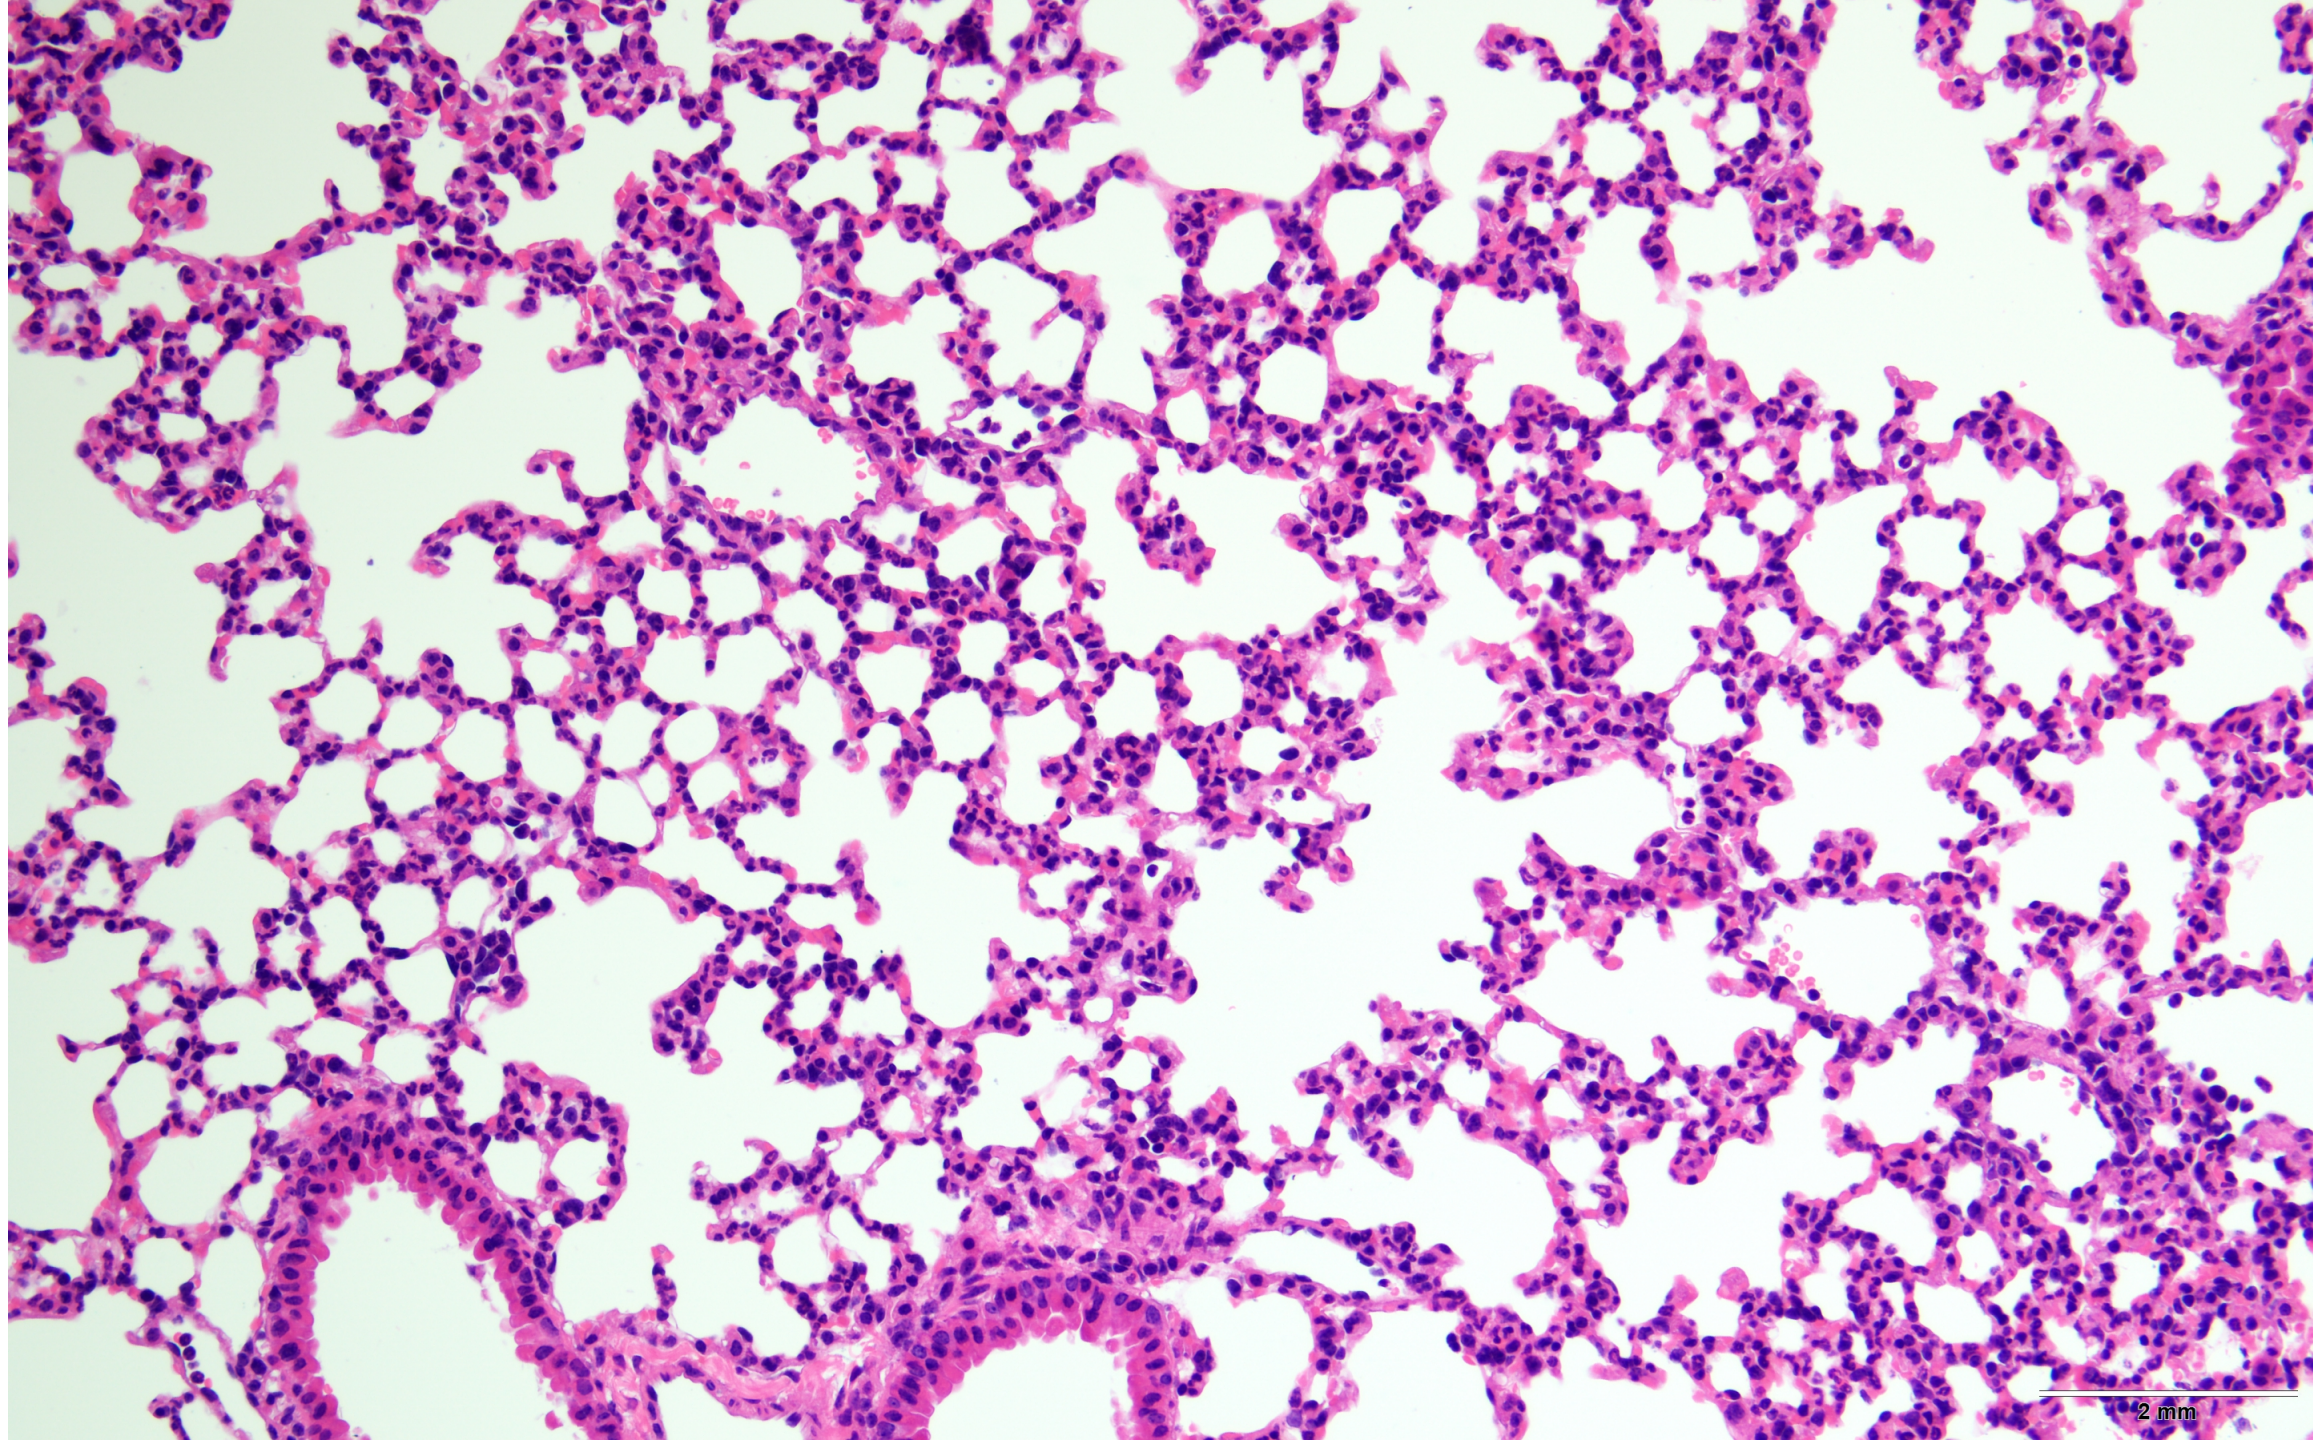

2 mm

**WB Sample image used in in Figure 1**

**TH  
(60KDa)**

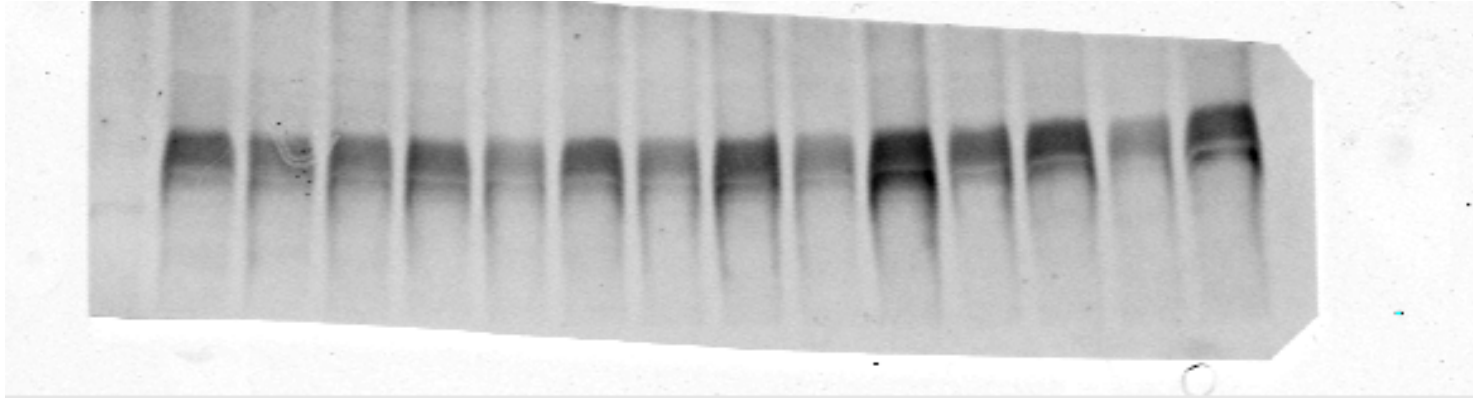

**$\beta$ -Actin  
(42KDa)**

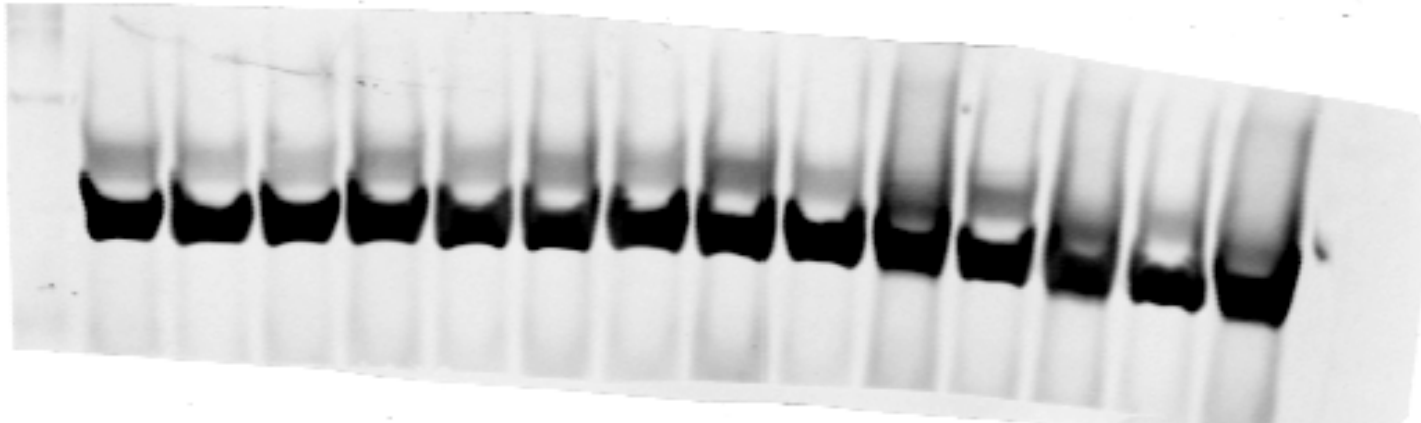

# WB Sample image used in in Figure 3

**p-I $\kappa$ B $\alpha$**   
**(35 KDa)**

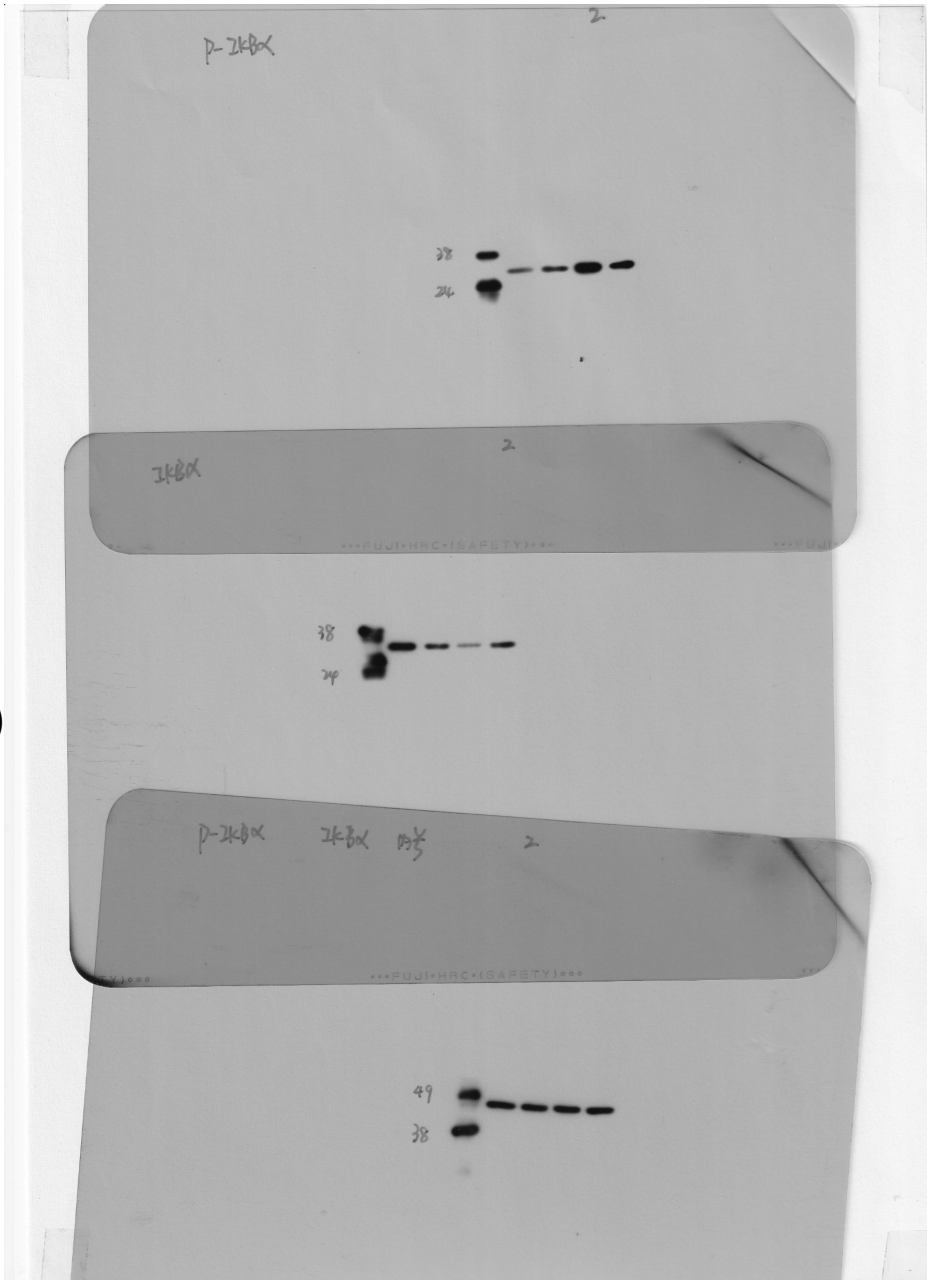

**I $\kappa$ B $\alpha$**   
**(35 KDa)**

**$\beta$ -Actin**  
**(42KDa)**

**p-NF $\kappa$ B p65**  
**(65 KDa)**

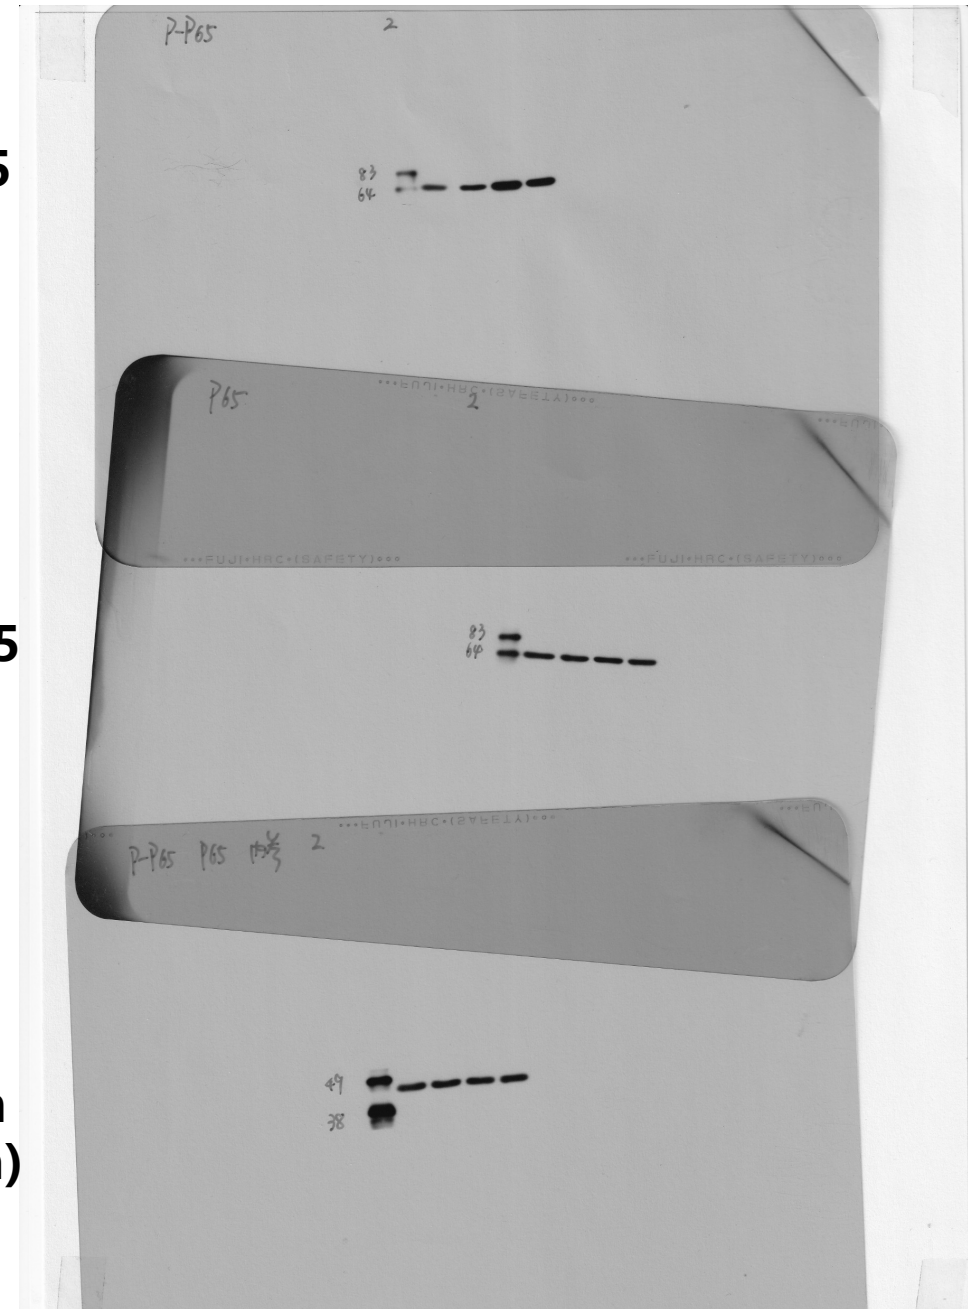

**NF $\kappa$ B P65**  
**(65 KDa)**

**$\beta$ -Actin**  
**(42KDa)**

**WB replicates image (p-NFκB p65, NFκB p65)**

**p-NFκB p65  
(65 KDa)**

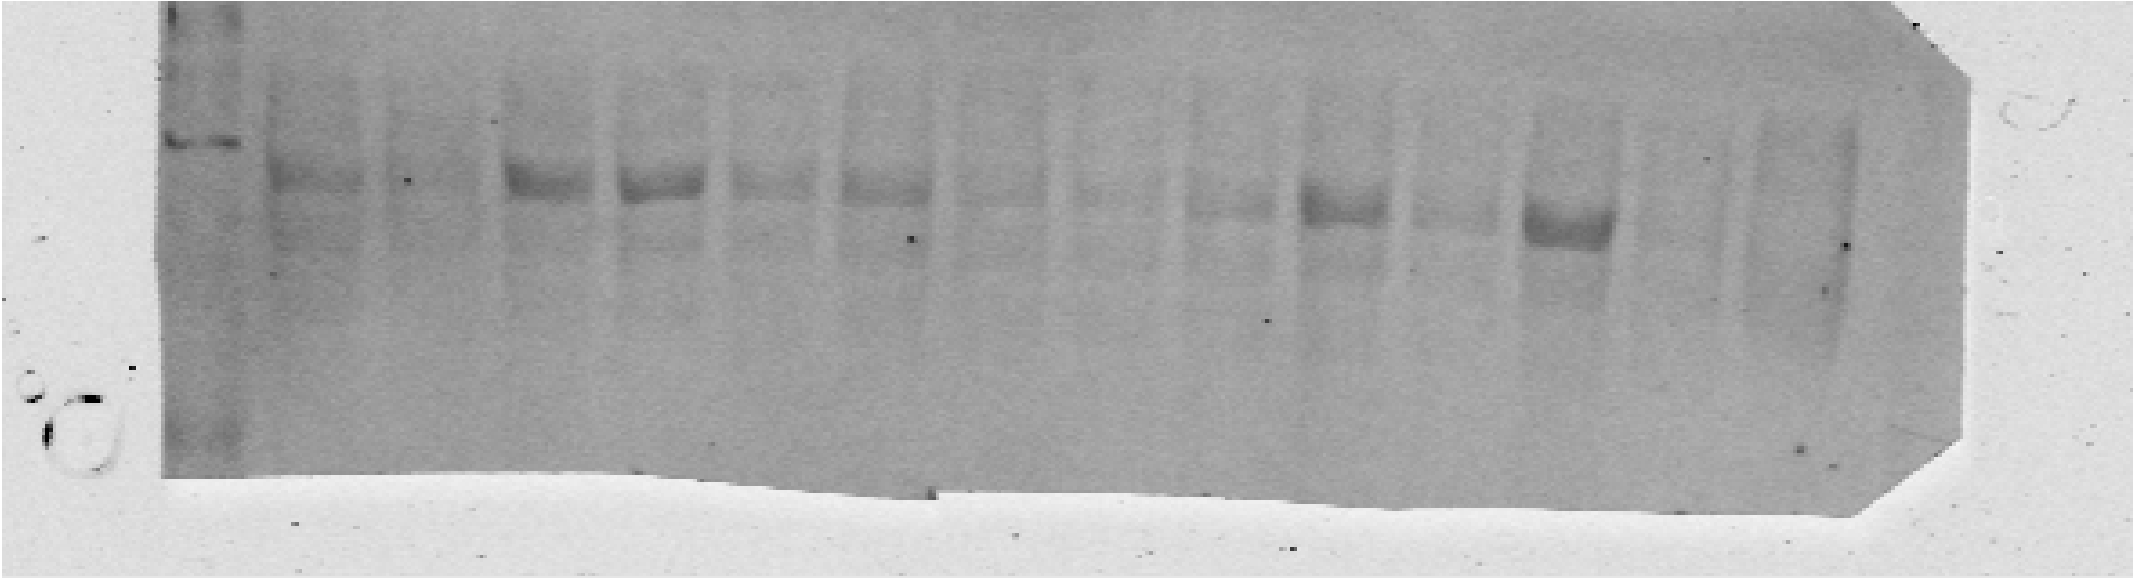

**NFκB P65  
(65 KDa)**

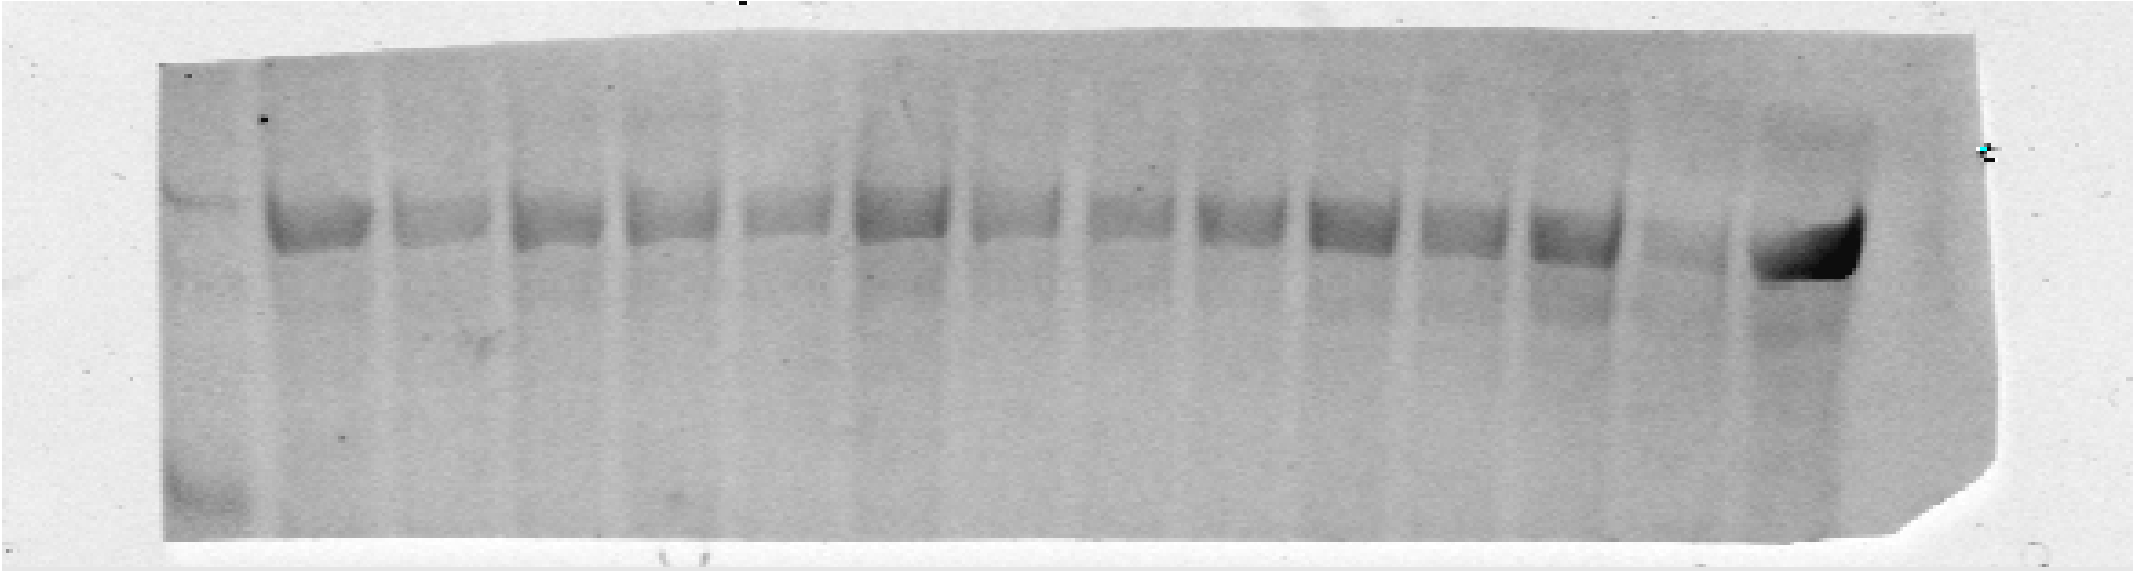

**WB replicates image (p-IκBα ,IκBα p-NFκB p65, NFκB p65, β-Actin)**

**IκBα  
(35 KDa)**

**NFκB P65  
(65 KDa)**

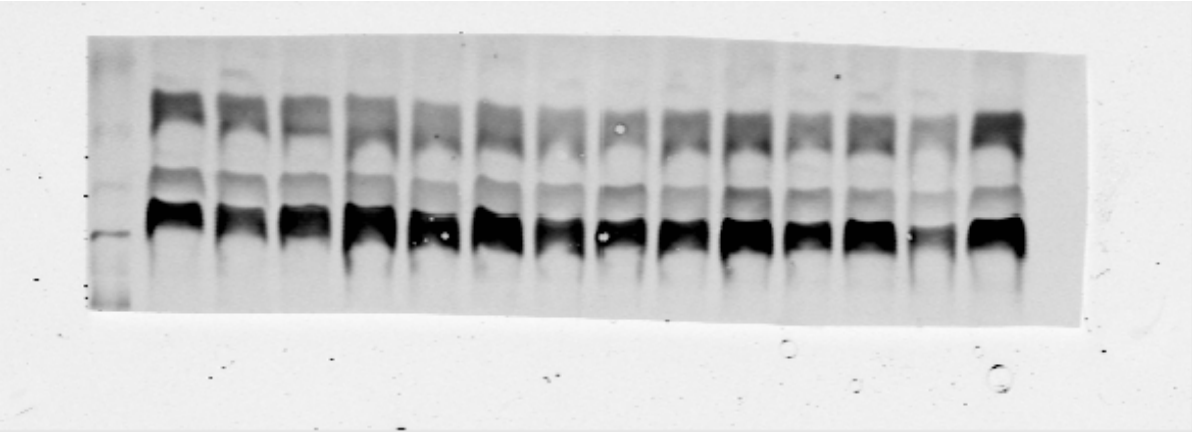

**p-NFκB p65  
(65 KDa)**

**p-IκBα  
(35 KDa)**

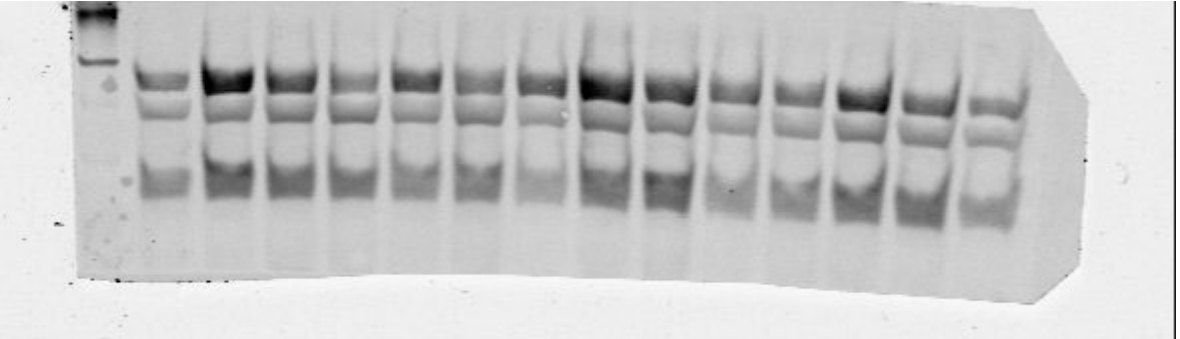

**β-Actin  
(42 KDa)**

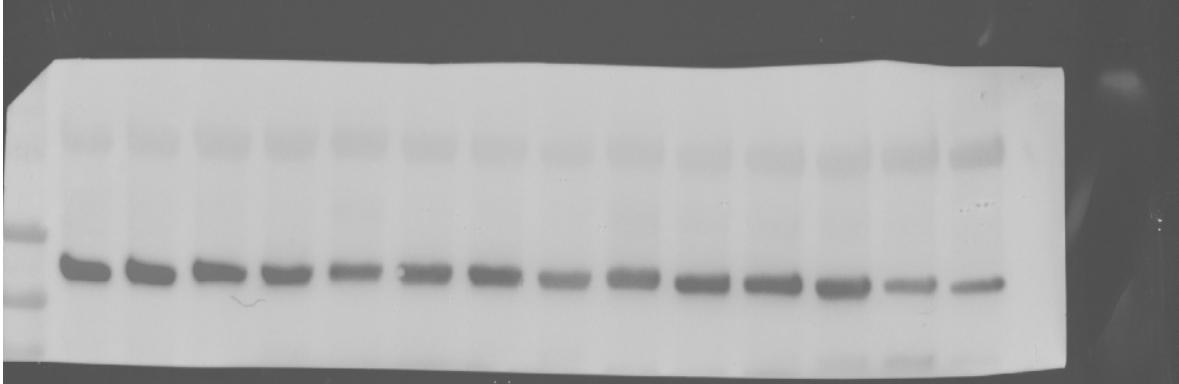



# WB replicates original image (TH and $\beta$ -Actin)

**TH(60KDa)**

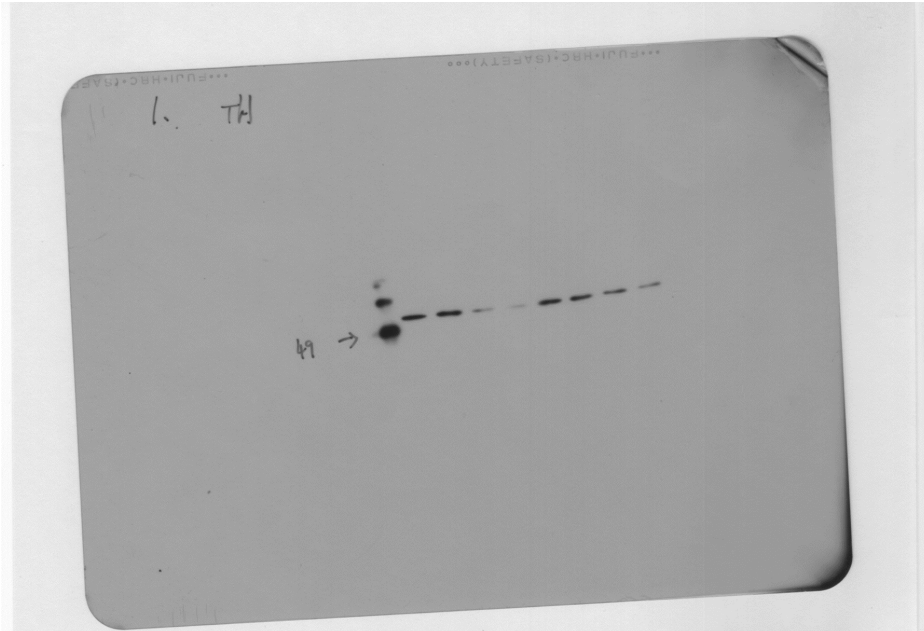

**$\beta$ -Actin  
(42KDa)**

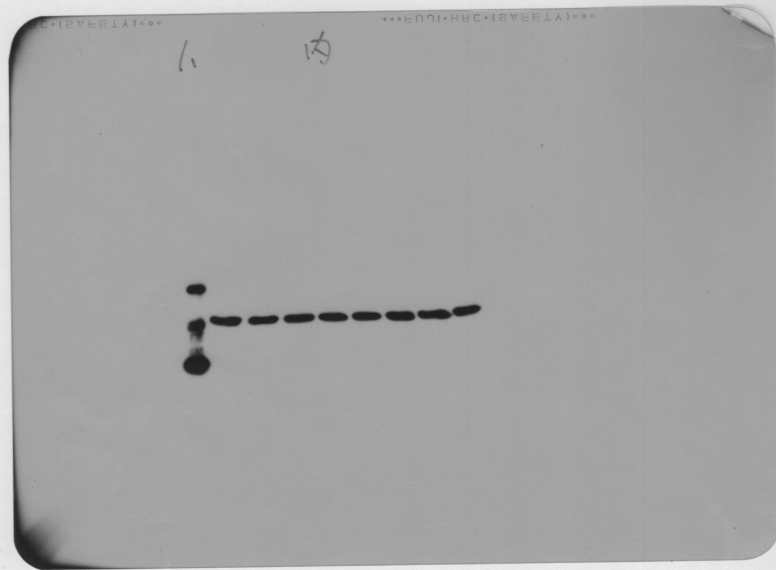

**TH(60KDa)**

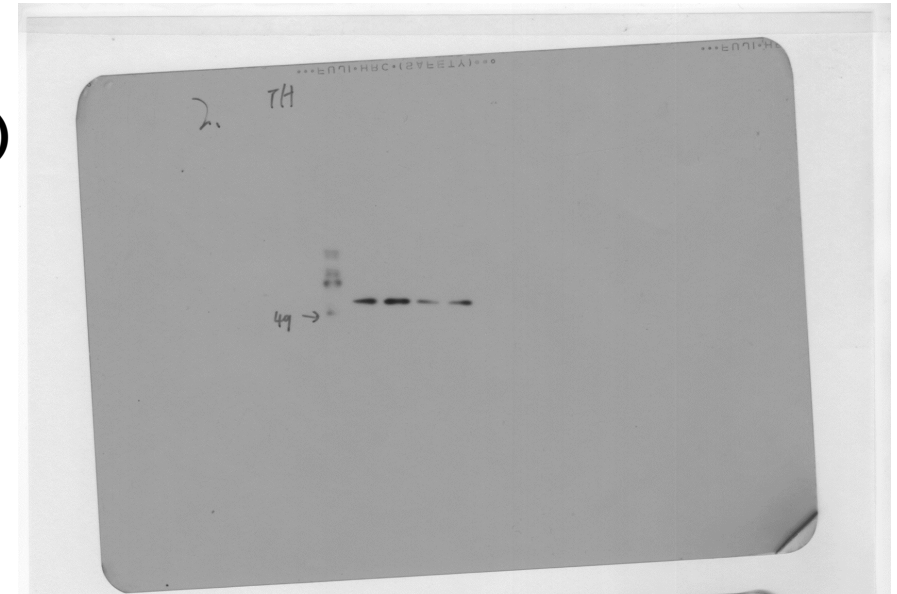

**$\beta$ -Actin  
(42KDa)**

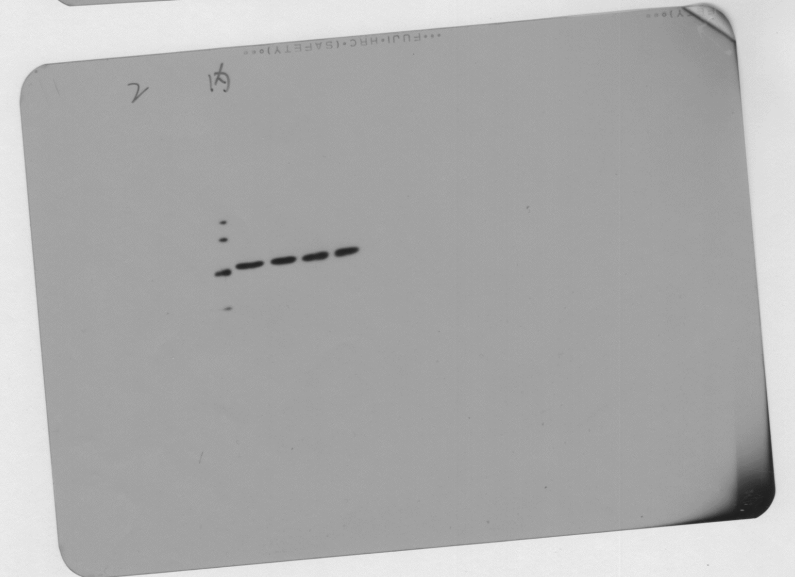

WB replicates original image (p-I $\kappa$ B $\alpha$  ,I $\kappa$ B $\alpha$  and  $\beta$ -Actin)

I $\kappa$ B $\alpha$   
(35 KDa)

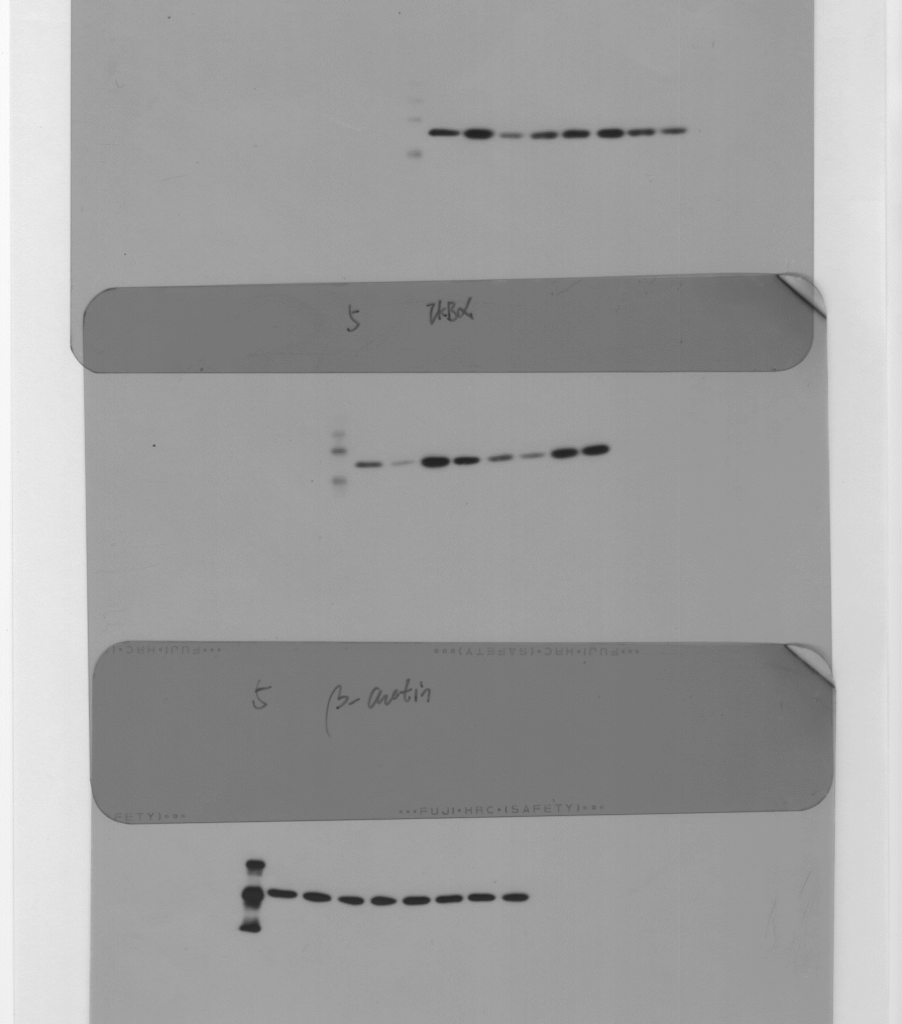

p-I $\kappa$ B $\alpha$   
(35 KDa)



$\beta$ -Actin  
(42 KDa)



p-I $\kappa$ B $\alpha$   
(35 KDa)

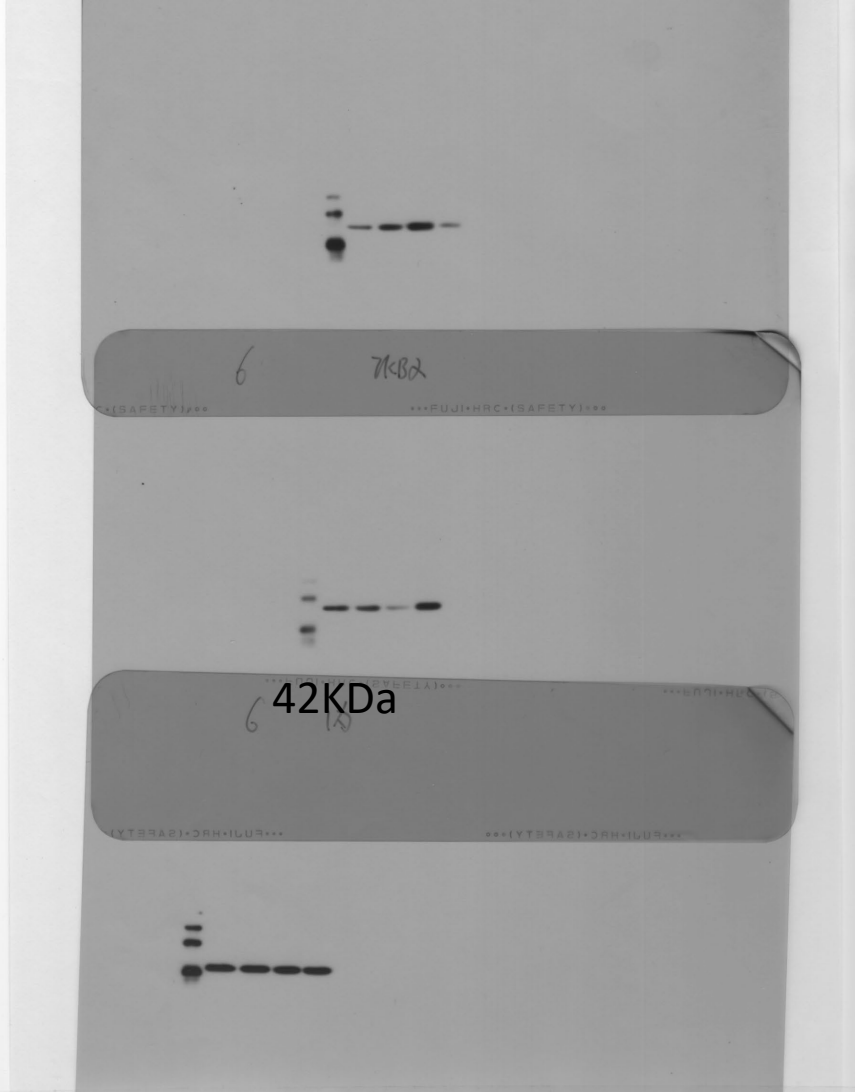

I $\kappa$ B $\alpha$   
(35 KDa)



$\beta$ -Actin  
(42 KDa)



WB replicates original image (p-NFκB p65 ,NFκB p65 and β-Actin)

p-NFκB p65  
(65 KDa)

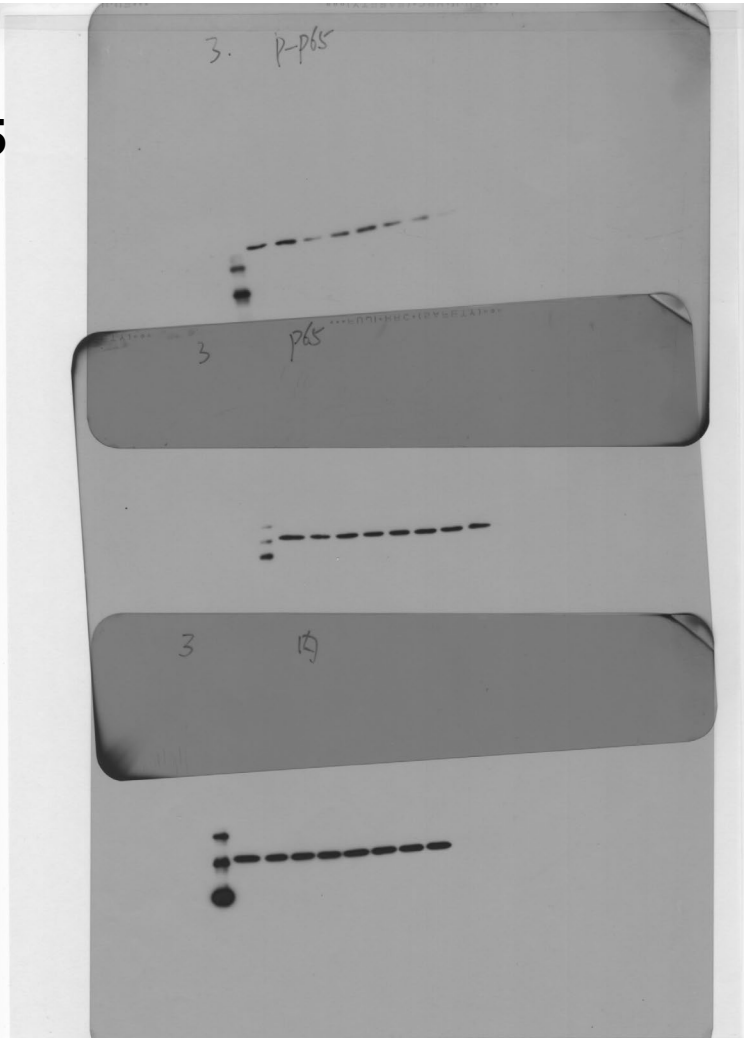

NFκB P65  
(65 KDa)

p-NFκB p65  
(65 KDa)

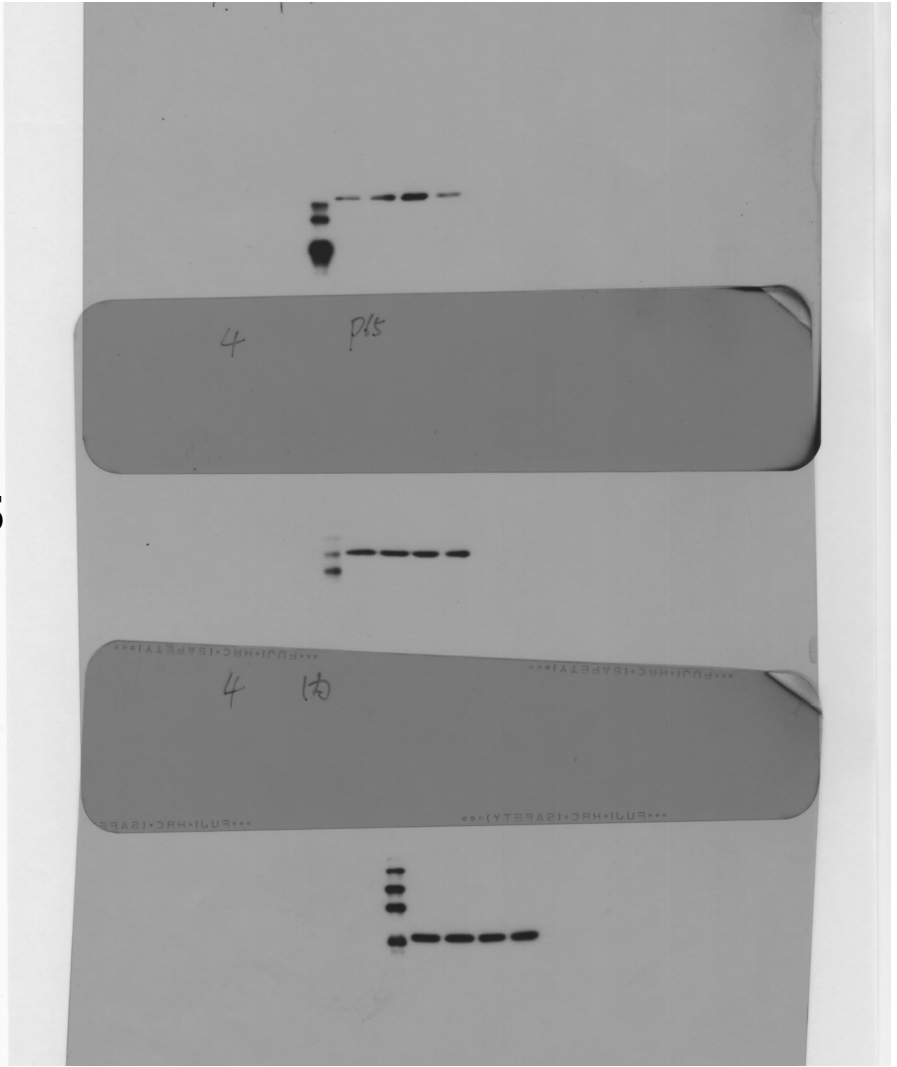

NFκB P65  
(65 KDa)

β-Actin  
(42 KDa)

β-Actin  
(42 KDa)
